# Supplementary material
Source: Springer Nature journal article supplement (https://www.springermedizin.de/resource/supplementary/12916_2011_435_MOESM1_ESM.pdf/9599932)
Supplement: MOESM1 [file 9599932]

**Combine direct and indirect evidence**

**Indirect evidence  
obtained across  
RCTs**

**A vs.C**

**Direct evidence  
obtained within  
RCTs**

**A vs.B**  
RCTs

**B vs.C**  
RCTs

**A vs.C**  
RCTs
